# Supplementary material for: Striving for Perfection: How Stable Is Orthodontic Treatment When Excellent Outcomes Are Achieved? A 9-Year Post-Treatment Retrospective Study
Source: MDPI journal article supplement (doi:10.3390/jcm12247692), 2023-12-14
Supplement: s1 [file s1]

**Table S1.** Cross-table of PAR improvement categories at T1 and T2 compared to T0.

|       |                        | T0-T2            |          |                        |       |
|-------|------------------------|------------------|----------|------------------------|-------|
|       |                        | Greatly improved | Improved | Worse or no difference | Total |
| T0-T1 | Greatly improved       | 51               | 20       | 1                      | 72    |
|       | Improved               | 0                | 11       | 2                      | 13    |
|       | Worse or no difference | 0                | 0        | 0                      | 0     |
|       | Total                  | 51               | 31       | 3                      | 85    |

**Table S2.** Prognostic factors for T1-T2 changes in overjet, overbite, arch width and length.

[illegible]

**Table S3.** Prognostic factors for changes in PAR (T2-T1) and for LI grade at T2.

|                 | Prognostic factor                                                                                                                                                                                                                                                                                                                                                                                                                                                                          | Coef.      | Std. Err. | t     | P> t  | [95% Conf. Interval] |          |
|-----------------|--------------------------------------------------------------------------------------------------------------------------------------------------------------------------------------------------------------------------------------------------------------------------------------------------------------------------------------------------------------------------------------------------------------------------------------------------------------------------------------------|------------|-----------|-------|-------|----------------------|----------|
| PAR (T2-T1)     | Lower fixed retainer at T2                                                                                                                                                                                                                                                                                                                                                                                                                                                                 | -11.10     | 2.31      | -4.80 | 0.000 | -15.74               | -6.56    |
|                 | Non-extraction treatment                                                                                                                                                                                                                                                                                                                                                                                                                                                                   | 5.97       | 1.63      | 3.66  | 0.001 | 2.70                 | 9.24     |
|                 | Essix retainer at T1                                                                                                                                                                                                                                                                                                                                                                                                                                                                       | 5.38       | 1.36      | -3.97 | 0.000 | -8.11                | -2.66    |
|                 | <p>- The presence of a lower fixed retainer at T2 correlates with 11.1 units decrease in difference in PAR score from T1 to T2, compared to no lower fixed retainer at T2.</p> <p>- A non-extraction treatment correlates with 6.0 units increase in difference in PAR score from T1 to T2 compared to an extraction treatment.</p> <p>- An upper Essix retainer at T1 correlates with 5.4 units decrease in difference in PAR score from T1 to T2 compared to an upper Begg retainer.</p> |            |           |       |       |                      |          |
|                 | Prognostic factor                                                                                                                                                                                                                                                                                                                                                                                                                                                                          | Odds ratio | Std. Err. | z     | P> t  | [95% Conf. Interval] |          |
| LII grade at T2 | LII at T1                                                                                                                                                                                                                                                                                                                                                                                                                                                                                  | 0.08       | 0.06      | -3.33 | 0.001 | 0.02                 | 0.35     |
|                 | Lower fixed retainer at T2                                                                                                                                                                                                                                                                                                                                                                                                                                                                 | 732.95     | 1603.18   | 3.02  | 0.003 | 10.07                | 53321.82 |
|                 | <p>- A 1-mm increment in LII index at T1 correlates with a change of 0.08 in the odds of being in a better LII grade at T2.</p> <p>- The presence of a lower fixed retainer at T2 correlates with a change of 733 in the odds of being in a better LII grade at T2.</p>                                                                                                                                                                                                                    |            |           |       |       |                      |          |

PAR; Peer Assessment Rating Index, LI; Little's Irregularity Index.

Significance level: p-value<0.0033 (Bonferroni correction for 15 outcomes modelled).
